# Supplementary material for: Crystallization and architecture engineering of ZnWO4 for enhanced photoluminescence
Source: Royal Society of Chemistry journal article supplement (doi:10.1039/d0ce00828a), 2020-01-01
Supplement: d0ce00828a1.pdf [file d0ce00828a1.pdf]

## Supplementary Information

### **Crystallization and architecture engineering of ZnWO<sub>4</sub> for enhanced photoluminescence**

Meiting Li<sup>a,b,c</sup>, Xuejiao Wang<sup>d</sup>, Qi Zhu<sup>a,b</sup>, Ji-Guang Li<sup>\*c</sup>, and Byung-Nam Kim<sup>c</sup>

<sup>a</sup> Key Laboratory for Anisotropy and Texture of Materials (Ministry of Education), School of Materials Science and Engineering, Northeastern University, Shenyang, Liaoning 110819, China

<sup>b</sup> Research Center for Advanced Ceramic Materials, School of Materials Science and Engineering, Northeastern University, Shenyang, Liaoning 110819, China

<sup>c</sup> Research Center for Functional Materials, National Institute for Materials Science, Tsukuba, Ibaraki 305-0044, Japan

<sup>d</sup> College of New Energy, Bohai University, Jinzhou, Liaoning 121007, China

\*Corresponding author

Dr. Ji-Guang Li

National Institute for Materials Science

Tel: +81-29-860-4394

E-mail: [LI.Jiguang@nims.go.jp](mailto:LI.Jiguang@nims.go.jp)

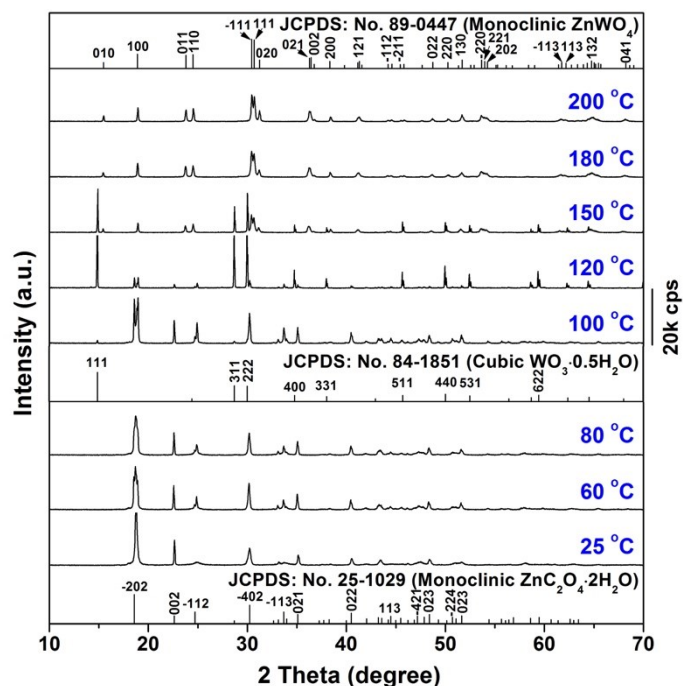

**Fig. S1** XRD profiles showing temperature-dependent phase evolution of the  $R=1/R'=3$  sample. The standard diffractions of monoclinic  $\text{ZnC}_2\text{O}_4 \cdot 2\text{H}_2\text{O}$  and cubic  $\text{WO}_3 \cdot 0.5\text{H}_2\text{O}$  were included as bars for comparison.

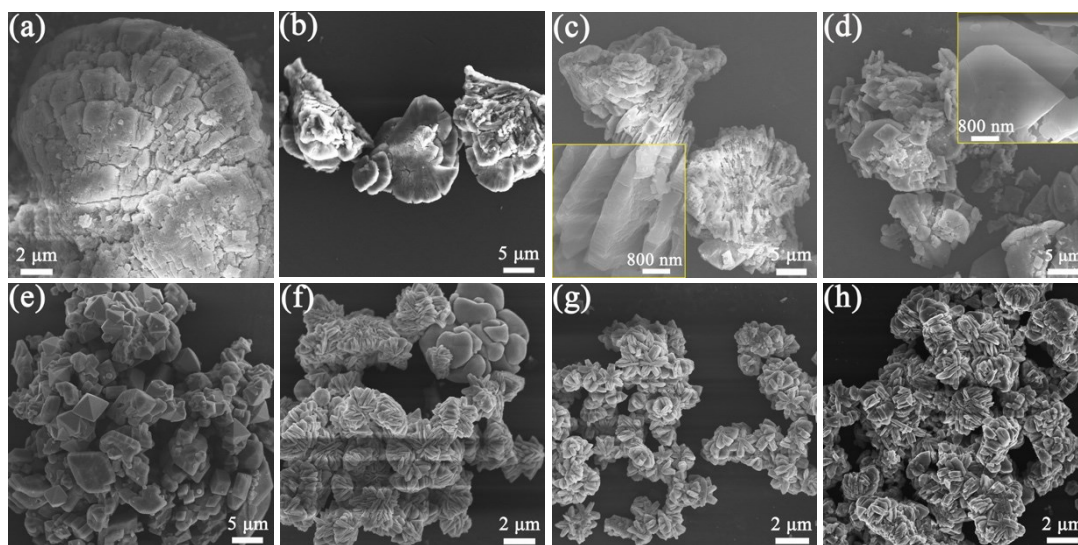

**Fig. S2** FE-SEM micrographs showing temperature-dependent morphology evolution of the  $R=1/R'=3$  sample, with the hydrothermal temperature being 25 °C (a), 60 °C (b), 80 °C (c), 100 °C (d), 120 °C (e), 150 °C (f), 180 °C (g), and 200 °C (h). The insets in (c) and (d) are magnified views of the products.

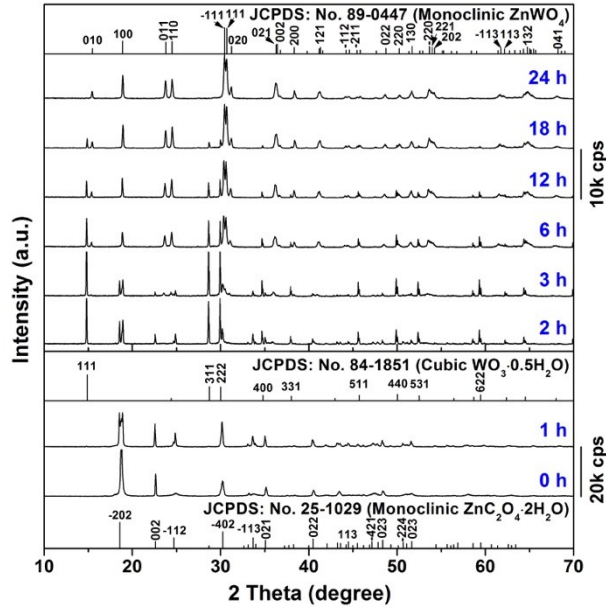

**Fig. S3** XRD patterns showing time-course phase evolution of the  $R=1/R'=3$  sample.

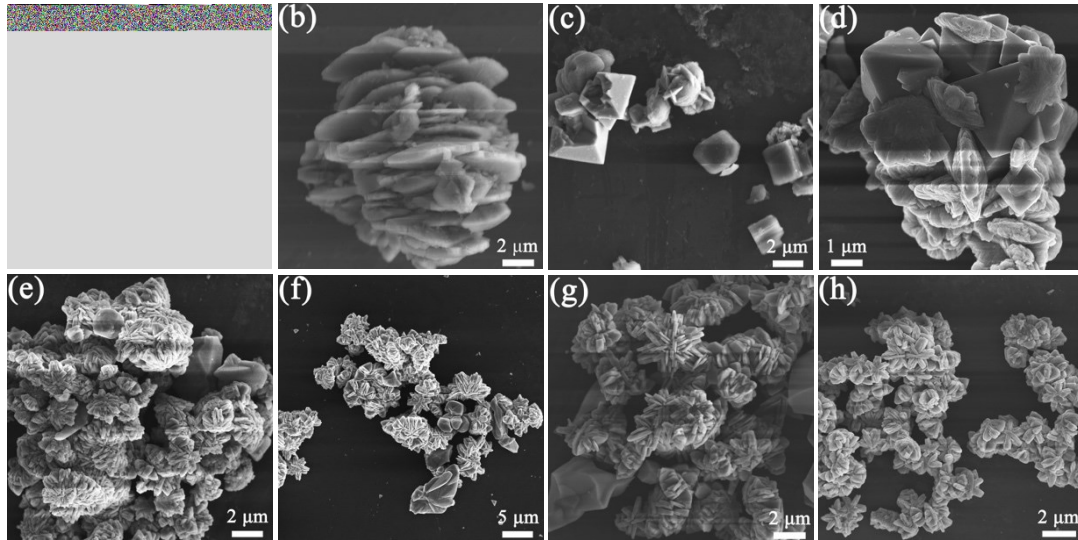

**Fig. S4** FE-SEM micrographs showing time-course morphology evolution of the  $R=1/R'=3$  sample, with the reaction duration being 0 h (a), 1 h (b), 2 h (c), 3 h (d), 6 h (e), 12 h (f), 18 h (g), and 24 h (h).

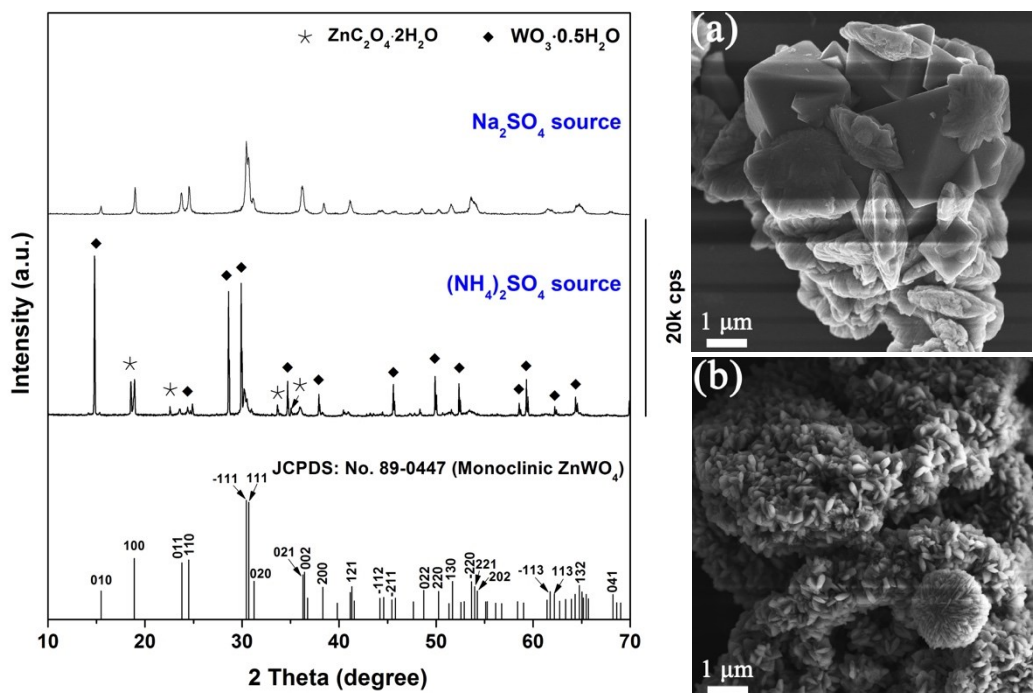

**Fig. S5** XRD patterns and SEM morphologies for the 3 h hydrothermal products synthesized under  $R=1/R'=3$  with  $(\text{NH}_4)_2\text{SO}_4$  (a) and  $\text{Na}_2\text{SO}_4$  (b) as sulfate sources.

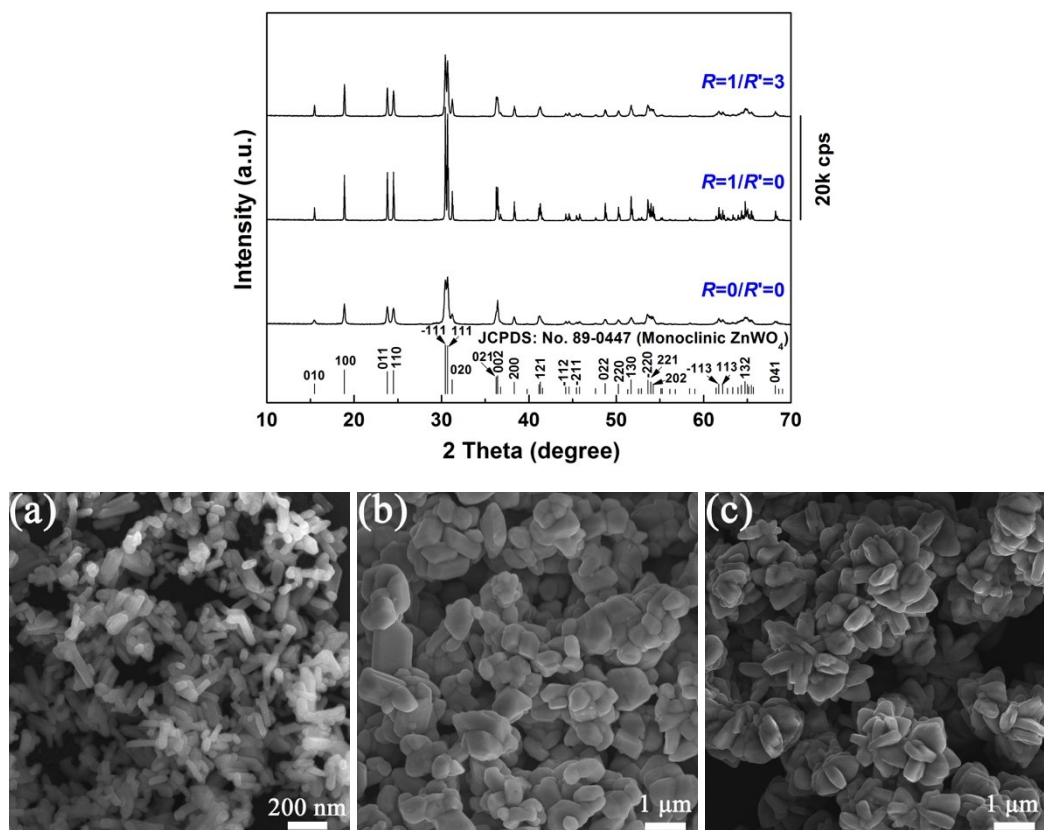

**Fig. S6** XRD patterns and SEM morphologies for the  $R=0/R'=0$  (a),  $R=1/R'=0$  (b) and  $R=1/R'=3$  (c) hydrothermal products after calcination at 700 °C for 2 h.

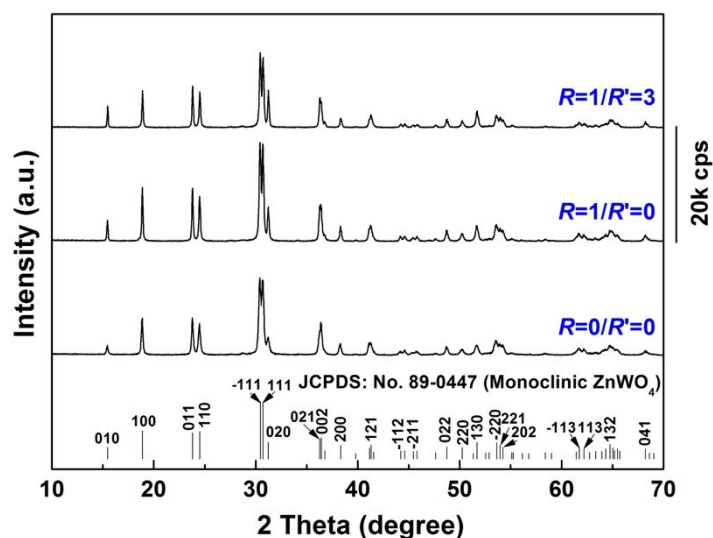

**Fig. S7** XRD profiles for the  $R=0/R'=0$ ,  $R=1/R'=0$  and  $R=1/R'=3$  ( $\text{Zn}_{0.98}\text{Eu}_{0.02}$ ) $\text{WO}_4$  phosphors after calcination at 700 °C for 2 h.

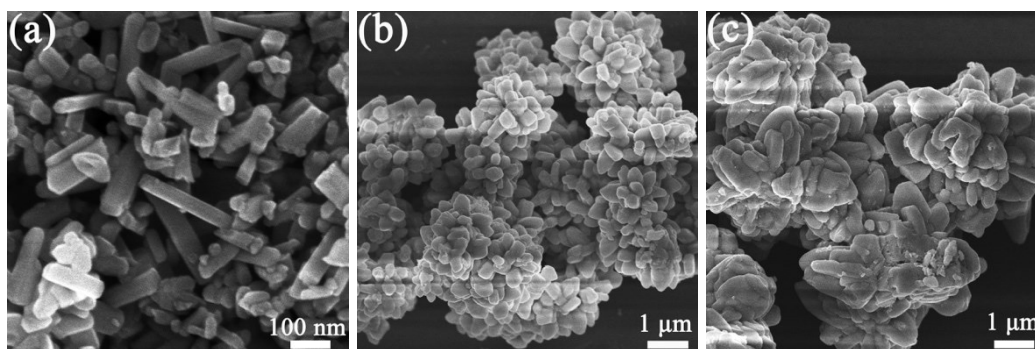

**Fig. S8** FE-SEM micrographs for the  $R=0/R'=0$  (a),  $R=1/R'=0$  (b) and  $R=1/R'=3$  (c) ( $\text{Zn}_{0.98}\text{Eu}_{0.02}$ ) $\text{WO}_4$  phosphors after calcination at 700 °C for 2 h.

Table S1 A summary of fitting parameters for  $[\text{WO}_6]^{6-}$  emissions in the  $\text{ZnWO}_4$  and ( $\text{Zn}_{0.98}\text{Eu}_{0.02}$ ) $\text{WO}_4$  phosphors

| Samples                                         |            | $A_1$               | $\tau_1$          | $A_2$                  | $\tau_2$          | $A$                 | $\tau$ |
|-------------------------------------------------|------------|---------------------|-------------------|------------------------|-------------------|---------------------|--------|
|                                                 |            |                     | ( $\mu\text{s}$ ) |                        | ( $\mu\text{s}$ ) |                     |        |
| $\text{ZnWO}_4$                                 | $R=0/R'=0$ | $8.336 \times 10^5$ | 18.56             | $2.544 \times 10^4$    | 50.40             | -                   | -      |
|                                                 | $R=1/R'=0$ | -                   | -                 | -                      | -                 | $2.681 \times 10^5$ | 28.39  |
|                                                 | $R=1/R'=3$ | -                   | -                 | -                      | -                 | $5.188 \times 10^5$ | 23.89  |
| $(\text{Zn}_{0.98}\text{Eu}_{0.02})\text{WO}_4$ | $R=0/R'=0$ | $1.546 \times 10^5$ | 26.31             | $2.328 \times 10^{10}$ | 6.93              | -                   | -      |
|                                                 | $R=1/R'=0$ | -                   | -                 | -                      | -                 | $2.018 \times 10^6$ | 18.38  |
|                                                 | $R=1/R'=3$ | -                   | -                 | -                      | -                 | $1.680 \times 10^6$ | 19.55  |
